# Supplementary material
Source: MDPI journal article supplement (https://www.mdpi.com/2220-9964/9/4/253)
Supplement: s1 [file s1]

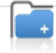

## Results Overview

[PRINT OVERVIEW](#) | [INDIVIDUAL RESPONSES](#)

### Results Overview

This page shows the results overview, or the summary of all responses to this survey (filtered by any active report filters or page selections).

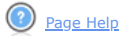

[Go to Survey List](#)

[Go to Report Menu](#)

nitro<sup>PDF</sup> software

### Evaluation of Relief Shading Methods Applied to Landforms

**Respondents:** 193 displayed, 968 total **Status:** Closed  
**Launched Date:** 28.02.2020 **Closed Date:** 29.02.2020  
**Display:**  **Manage Filters** 1 filter  
Active Report Filters:  
Filter Type: Question; QuestionID: 107826 SubItemID: 134350 AnswerID: 329722  
Note: "(skipped this question)" can mean that the question was skipped, or that the user closed the browser without saving the page. **Share Results** Disabled

1. The images below show different methods used to generate shaded reliefs automatically. Please choose the most/least suitable methods regarding a visual block mountains on them. For each category, more than one method can be chosen.

|                                              | Most suitable | Rather suitable | Not sure    | Rather not suitable | Least suitable | Response Total | Points |
|----------------------------------------------|---------------|-----------------|-------------|---------------------|----------------|----------------|--------|
| Method 1                                     | 47.15% (91)   | 40.41% (78)     | 7.77% (15)  | 2.59% (5)           | 2.07% (4)      | 193            | n/a    |
| Method 2                                     | 16.67% (32)   | 42.19% (81)     | 17.71% (34) | 19.27% (37)         | 4.17% (8)      | 192            | n/a    |
| Method 3                                     | 8.33% (16)    | 14.58% (28)     | 16.15% (31) | 31.77% (61)         | 29.17% (56)    | 192            | n/a    |
| Method 4                                     | 17.71% (34)   | 43.75% (84)     | 21.35% (41) | 14.58% (28)         | 2.6% (5)       | 192            | n/a    |
| Method 5                                     | 30.73% (59)   | 17.71% (34)     | 15.62% (30) | 25.52% (49)         | 10.42% (20)    | 192            | n/a    |
| Method 6                                     | 19.27% (37)   | 12.5% (24)      | 10.94% (21) | 28.65% (55)         | 28.65% (55)    | 192            | n/a    |
| <b>Total Respondents (For this Question)</b> |               |                 |             |                     |                | <b>193</b>     |        |

[View conditional responses \(if applicat](#)

2. Feel free to explain your choice:

[View responses to this questio](#)

**Total Respondents (For this Question)**

(skipped this question)

3. The images below show different methods used to generate shaded reliefs automatically. Please choose the most/least suitable methods regarding a visual folded mountains on them. For each category, more than one method can be chosen.

|                                              | Most suitable | Rather suitable | Not sure    | Rather not suitable | Least suitable | Response Total | Points |
|----------------------------------------------|---------------|-----------------|-------------|---------------------|----------------|----------------|--------|
| Method 1                                     | 9.83% (17)    | 16.18% (28)     | 12.72% (22) | 38.15% (66)         | 23.12% (40)    | 173            | n/a    |
| Method 2                                     | 8.67% (15)    | 13.29% (23)     | 13.29% (23) | 32.37% (56)         | 32.37% (56)    | 173            | n/a    |
| Method 3                                     | 12.72% (22)   | 47.98% (83)     | 19.08% (33) | 17.92% (31)         | 2.31% (4)      | 173            | n/a    |
| Method 4                                     | 31.21% (54)   | 46.24% (80)     | 15.03% (26) | 6.36% (11)          | 1.16% (2)      | 173            | n/a    |
| Method 5                                     | 34.68% (60)   | 21.39% (37)     | 9.83% (17)  | 21.39% (37)         | 12.72% (22)    | 173            | n/a    |
| Method 6                                     | 21.97% (38)   | 36.42% (63)     | 17.92% (31) | 17.92% (31)         | 5.78% (10)     | 173            | n/a    |
| <b>Total Respondents (For this Question)</b> |               |                 |             |                     |                | <b>173</b>     |        |

(skipped this question)

[View conditional responses \(if applicat](#)

4. Feel free to explain your choice:

[View responses to this questio](#)

**Total Respondents (For this Question)**

(skipped this question)

5. The images below show different methods used to generate shaded reliefs automatically. Please choose the most/least suitable methods regarding a visual mountains formed by erosion processes. For each category, more than one method can be chosen.

|                                              | Most suitable | Rather suitable | Not sure    | Rather not suitable | Least suitable | Response Total | Points |
|----------------------------------------------|---------------|-----------------|-------------|---------------------|----------------|----------------|--------|
| Method 1                                     | 43.45% (73)   | 42.86% (72)     | 11.31% (19) | 1.79% (3)           | 0.6% (1)       | 168            | n/a    |
| Method 2                                     | 12.5% (21)    | 14.29% (24)     | 23.81% (40) | 30.95% (52)         | 18.45% (31)    | 168            | n/a    |
| Method 3                                     | 5.95% (10)    | 13.69% (23)     | 13.1% (22)  | 38.1% (64)          | 29.17% (49)    | 168            | n/a    |
| Method 4                                     | 25% (42)      | 46.43% (78)     | 13.69% (23) | 13.1% (22)          | 1.79% (3)      | 168            | n/a    |
| Method 5                                     | 15.48% (26)   | 43.45% (73)     | 20.83% (35) | 17.86% (30)         | 2.38% (4)      | 168            | n/a    |
| Method 6                                     | 27.38% (46)   | 19.64% (33)     | 12.5% (21)  | 23.21% (39)         | 17.26% (29)    | 168            | n/a    |
| <b>Total Respondents (For this Question)</b> |               |                 |             |                     |                | <b>168</b>     |        |

(skipped this question)

[View conditional responses \(if applicat](#)

6. Feel free to explain your choice:

[View responses to this questio](#)

**Total Respondents (For this Question)**

(skipped this question)

7. The images below show different methods used to generate shaded reliefs automatically. Please choose the most/least suitable methods regarding a visual drumlins. For each category, more than one method can be chosen.

|          | Most suitable | Rather suitable | Not sure    | Rather not suitable | Least suitable | Response Total | Points |
|----------|---------------|-----------------|-------------|---------------------|----------------|----------------|--------|
| Method 1 | 29.76% (50)   | 44.05% (74)     | 9.52% (16)  | 14.29% (24)         | 2.38% (4)      | 168            | n/a    |
| Method 2 | 30.72% (51)   | 33.73% (56)     | 15.06% (25) | 18.07% (30)         | 2.41% (4)      | 166            | n/a    |
| Method 3 | 11.31% (19)   | 20.83% (35)     | 17.86% (30) | 26.19% (44)         | 23.81% (40)    | 168            | n/a    |
| Method 4 | 6.02% (10)    | 10.24% (17)     | 12.65% (21) | 28.31% (47)         | 42.77% (71)    | 166            | n/a    |
| Method 5 | 4.82% (8)     | 13.25% (22)     | 12.05% (20) | 39.16% (65)         | 30.72% (51)    | 166            | n/a    |
| Method 6 | 7.14% (12)    | 15.48% (26)     | 17.26% (29) | 35.71% (60)         | 24.4% (41)     | 168            | n/a    |

**Total Respondents (For this Question)** 168

(skipped this question)

25

8. Feel free to explain your choice:

View responses to this questic

**Total Respondents** (For this Question)

(skipped this question)

9. The images below show different methods used to generate shaded reliefs automatically. Please choose the most/least suitable methods regarding a visual i plateaus on them. For each category, more than one method can be chosen.

|                                              | Most suitable | Rather suitable | Not sure    | Rather not suitable | Least suitable | Response Total | Points |
|----------------------------------------------|---------------|-----------------|-------------|---------------------|----------------|----------------|--------|
| Method 1                                     | 26.51% (44)   | 45.18% (75)     | 16.87% (28) | 10.24% (17)         | 1.2% (2)       | <b>166</b>     | n/a    |
| Method 2                                     | 21.69% (36)   | 37.35% (62)     | 18.67% (31) | 18.07% (30)         | 4.22% (7)      | <b>166</b>     | n/a    |
| Method 3                                     | 14.46% (24)   | 22.89% (38)     | 16.87% (28) | 26.51% (44)         | 19.28% (32)    | <b>166</b>     | n/a    |
| Method 4                                     | 22.89% (38)   | 24.1% (40)      | 16.87% (28) | 20.48% (34)         | 15.66% (26)    | <b>166</b>     | n/a    |
| Method 5                                     | 12.65% (21)   | 20.48% (34)     | 15.66% (26) | 28.31% (47)         | 22.89% (38)    | <b>166</b>     | n/a    |
| Method 6                                     | 16.87% (28)   | 33.73% (56)     | 24.7% (41)  | 17.47% (29)         | 7.23% (12)     | <b>166</b>     | n/a    |
| <b>Total Respondents</b> (For this Question) |               |                 |             |                     |                | <b>166</b>     |        |
| (skipped this question)                      |               |                 |             |                     |                | 27             |        |

View conditional responses (if applical

10. Feel free to explain your choice:

View responses to this questic

**Total Respondents** (For this Question)

(skipped this question)

11. The images below show different methods used to generate shaded reliefs automatically. Please choose the most/least suitable methods regarding a visual of V-shaped valleys on them. For each category, more than one method can be chosen.

|                                              | Most suitable | Rather suitable | Not sure    | Rather not suitable | Least suitable | Response Total | Points |
|----------------------------------------------|---------------|-----------------|-------------|---------------------|----------------|----------------|--------|
| Method 1                                     | 22.09% (36)   | 31.29% (51)     | 18.4% (30)  | 20.86% (34)         | 7.36% (12)     | <b>163</b>     | n/a    |
| Method 2                                     | 27.61% (45)   | 52.76% (86)     | 9.82% (16)  | 9.2% (15)           | 0.61% (1)      | <b>163</b>     | n/a    |
| Method 3                                     | 13.5% (22)    | 24.54% (40)     | 22.7% (37)  | 22.09% (36)         | 17.18% (28)    | <b>163</b>     | n/a    |
| Method 4                                     | 12.88% (21)   | 44.79% (73)     | 14.72% (24) | 22.7% (37)          | 4.91% (8)      | <b>163</b>     | n/a    |
| Method 5                                     | 39.26% (64)   | 23.31% (38)     | 11.66% (19) | 19.02% (31)         | 6.75% (11)     | <b>163</b>     | n/a    |
| Method 6                                     | 7.98% (13)    | 33.13% (54)     | 19.02% (31) | 23.31% (38)         | 16.56% (27)    | <b>163</b>     | n/a    |
| <b>Total Respondents</b> (For this Question) |               |                 |             |                     |                | <b>163</b>     |        |
| (skipped this question)                      |               |                 |             |                     |                | 30             |        |

View conditional responses (if applical

12. Feel free to explain your choice:

View responses to this questic

**Total Respondents** (For this Question)

(skipped this question)

13. The images below show different methods used to generate shaded reliefs automatically. Please choose the most/least suitable methods regarding a visual of U-shaped valleys on them. For each category, more than one method can be chosen.

|                                              | Most suitable | Rather suitable | Not sure    | Rather not suitable | Least suitable | Response Total | Points |
|----------------------------------------------|---------------|-----------------|-------------|---------------------|----------------|----------------|--------|
| Method 1                                     | 22.84% (37)   | 33.33% (54)     | 16.67% (27) | 20.37% (33)         | 6.79% (11)     | <b>162</b>     | n/a    |
| Method 2                                     | 33.95% (55)   | 39.51% (64)     | 10.49% (17) | 12.35% (20)         | 3.7% (6)       | <b>162</b>     | n/a    |
| Method 3                                     | 4.32% (7)     | 13.58% (22)     | 23.46% (38) | 29.63% (48)         | 29.01% (47)    | <b>162</b>     | n/a    |
| Method 4                                     | 19.75% (32)   | 28.4% (46)      | 14.81% (24) | 24.69% (40)         | 12.35% (20)    | <b>162</b>     | n/a    |
| Method 5                                     | 20.37% (33)   | 45.68% (74)     | 23.46% (38) | 9.26% (15)          | 1.23% (2)      | <b>162</b>     | n/a    |
| Method 6                                     | 14.81% (24)   | 36.42% (59)     | 19.14% (31) | 17.28% (28)         | 12.35% (20)    | <b>162</b>     | n/a    |
| <b>Total Respondents</b> (For this Question) |               |                 |             |                     |                | <b>162</b>     |        |
| (skipped this question)                      |               |                 |             |                     |                | 31             |        |

View conditional responses (if applical

14. Feel free to explain your choice:

View responses to this questic

**Total Respondents** (For this Question)

(skipped this question)

15. The images below show different methods used to generate shaded reliefs automatically. Please choose the most/least suitable methods regarding a visual of alluvial fans on them. For each category, more than one method can be chosen.

|                                              | Most suitable | Rather suitable | Not sure    | Rather not suitable | Least suitable | Response Total | Points |
|----------------------------------------------|---------------|-----------------|-------------|---------------------|----------------|----------------|--------|
| Method 1                                     | 10.76% (17)   | 22.78% (36)     | 19.62% (31) | 29.75% (47)         | 17.09% (27)    | <b>158</b>     | n/a    |
| Method 2                                     | 30.38% (48)   | 39.24% (62)     | 14.56% (23) | 13.29% (21)         | 2.53% (4)      | <b>158</b>     | n/a    |
| Method 3                                     | 10.83% (17)   | 14.65% (23)     | 22.29% (35) | 29.94% (47)         | 22.29% (35)    | <b>157</b>     | n/a    |
| Method 4                                     | 12.26% (19)   | 40% (62)        | 27.74% (43) | 16.13% (25)         | 3.87% (6)      | <b>155</b>     | n/a    |
| Method 5                                     | 18.35% (29)   | 32.28% (51)     | 24.05% (38) | 17.72% (28)         | 7.59% (12)     | <b>158</b>     | n/a    |
| Method 6                                     | 10.13% (16)   | 32.28% (51)     | 23.42% (37) | 23.42% (37)         | 10.76% (17)    | <b>158</b>     | n/a    |
| <b>Total Respondents</b> (For this Question) |               |                 |             |                     |                | <b>158</b>     |        |
| (skipped this question)                      |               |                 |             |                     |                | 35             |        |

View conditional responses (if applical

16. Feel free to explain your choice:

View responses to this questic

**Total Respondents** (For this Question)

(skipped this question)

17. The images below show different methods used to generate shaded reliefs automatically. Please choose the most/least suitable methods regarding a visual of glaciers on them. For each category, more than one method can be chosen.

|          | Most suitable | Rather suitable | Not sure    | Rather not suitable | Least suitable | Response Total | Points |
|----------|---------------|-----------------|-------------|---------------------|----------------|----------------|--------|
| Method 1 | 23.9% (38)    | 42.14% (67)     | 20.13% (32) | 11.32% (18)         | 2.52% (4)      | <b>159</b>     | n/a    |
| Method 2 | 42.14% (67)   | 28.93% (46)     | 13.21% (21) | 11.32% (18)         | 4.4% (7)       | <b>159</b>     | n/a    |

|                                                         |             |             |             |             |              |            |            |
|---------------------------------------------------------|-------------|-------------|-------------|-------------|--------------|------------|------------|
| Method 3                                                | 15.72% (25) | 38.36% (61) | 19.5% (31)  | 20.13% (32) | 6.29% (10)   | <b>159</b> | <b>n/a</b> |
| Method 4                                                | 17.61% (28) | 45.28% (72) | 18.24% (29) | 16.98% (27) | 1.89% (3)    | <b>159</b> | <b>n/a</b> |
| Method 5                                                | 8.81% (14)  | 10.06% (16) | 16.35% (26) | 38.99% (62) | 25.79% (41)  | <b>159</b> | <b>n/a</b> |
| Method 6                                                | 3.77% (6)   | 8.18% (13)  | 4.4% (7)    | 17.61% (28) | 66.04% (105) | <b>159</b> | <b>n/a</b> |
| <b>Total Respondents</b> (For this Question)            |             |             |             |             |              | <b>159</b> |            |
| (skipped this question)                                 |             |             |             |             |              | 34         |            |
| <a href="#">View conditional responses (if applicat</a> |             |             |             |             |              |            |            |

18. Feel free to explain your choice:

[View responses to this questio](#)

|                                              |  |
|----------------------------------------------|--|
| <b>Total Respondents</b> (For this Question) |  |
| (skipped this question)                      |  |

19. What is your gender?

|                                                         | <b>Response<br/>Total</b> | <b>Response<br/>Percent</b> | <b>Points</b> |
|---------------------------------------------------------|---------------------------|-----------------------------|---------------|
| Male                                                    | 113                       | 73%                         | n/a           |
| Female                                                  | 39                        | 25%                         | n/a           |
| Other                                                   | 0                         | 0%                          | n/a           |
| Prefer not to say                                       | 2                         | 1%                          | n/a           |
| <b>Total Respondents</b> (For this Question)            | <b>154</b>                | <b>100%</b>                 |               |
| (skipped this question)                                 | 39                        |                             |               |
| <a href="#">View conditional responses (if applical</a> |                           |                             |               |

20. What is your age?

|                                                         | <b>Response<br/>Total</b> | <b>Response<br/>Percent</b> | <b>Points</b> |
|---------------------------------------------------------|---------------------------|-----------------------------|---------------|
| Under 18                                                | 0                         | 0%                          | n/a           |
| 18-24 years old                                         | 15                        | 10%                         | n/a           |
| 25-34 years old                                         | 47                        | 31%                         | n/a           |
| 35-44 years old                                         | 42                        | 27%                         | n/a           |
| 45-54 years old                                         | 26                        | 17%                         | n/a           |
| Over 55                                                 | 23                        | 15%                         | n/a           |
| Prefer not to say                                       | 1                         | 1%                          | n/a           |
| <b>Total Respondents</b> (For this Question)            | <b>154</b>                | <b>100%</b>                 |               |
| (skipped this question)                                 | 39                        |                             |               |
| <a href="#">View conditional responses (if applical</a> |                           |                             |               |

21. What is the highest degree or level of education you have completed?

|                                                         | <b>Response<br/>Total</b> | <b>Response<br/>Percent</b> | <b>Points</b> |
|---------------------------------------------------------|---------------------------|-----------------------------|---------------|
| Less than a high school diploma                         | 3                         | 2%                          | n/a           |
| High school degree or equivalent                        | 14                        | 9%                          | n/a           |
| Professional degree                                     | 11                        | 7%                          | n/a           |
| Bachelor's degree                                       | 23                        | 15%                         | n/a           |
| Master's degree                                         | 54                        | 35%                         | n/a           |
| Doctorate                                               | 47                        | 31%                         | n/a           |
| Prefer not to say                                       | 2                         | 1%                          | n/a           |
| <b>Total Respondents</b> (For this Question)            | <b>154</b>                | <b>100%</b>                 |               |
| (skipped this question)                                 | 39                        |                             |               |
| <a href="#">View conditional responses (if applical</a> |                           |                             |               |

22. How experienced are you with maps?

|                                                         | <b>Response<br/>Total</b> | <b>Response<br/>Percent</b> | <b>Points</b> |
|---------------------------------------------------------|---------------------------|-----------------------------|---------------|
| Rarely use maps                                         | 6                         | 4%                          | n/a           |
| Use maps weekly                                         | 28                        | 18%                         | n/a           |
| Deal with maps on a daily basis                         | 37                        | 24%                         | n/a           |
| Create maps                                             | 83                        | 54%                         | n/a           |
| <b>Total Respondents</b> (For this Question)            | <b>154</b>                | <b>100%</b>                 |               |
| (skipped this question)                                 | 39                        |                             |               |
| <a href="#">View conditional responses (if applical</a> |                           |                             |               |

23. How familiar are you with relief shading?

|                                                                                     | <b>Response<br/>Average</b> |
|-------------------------------------------------------------------------------------|-----------------------------|
| <a href="#">View responses to this question</a> <input type="button" value="view"/> | <b>68.53</b>                |
| <b>Total Respondents</b> (For this Question)                                        | <b>154</b>                  |
| (skipped this question)                                                             | 39                          |
